# Supplementary material for: The effect of CO2 enrichment on net photosynthesis of the red alga Furcellaria lumbricalis in a brackish water environment
Source: PeerJ. 2016 Oct 5;4:e2505. doi: 10.7717/peerj.2505 (PMC5068446; doi:10.7717/peerj.2505)
Supplement: Supplemental Information 2 [file peerj-04-2505-s002.xlsx]

## Sheet: Furc_data_mesocosm
hourly net primary production (NP) rate	Experimental year	pCO2	incubation day	Water temperature	PAR
mg O2 gdw–1 h–1		µatm		°C	μmol m–-2s—1
				*water temperature during incubations	*PAR during incubations
1.15	2012	200	1	16.6	400
1.17	2012	200	1	16.6	400
0.89	2012	200	1	16.6	400
0.92	2012	200	2	16.2	320
1.09	2012	200	2	16.2	320
1.5	2012	200	2	16.2	320
0.85	2012	200	3	18.3	700
1.02	2012	200	3	18.3	700
1.1	2012	200	3	18.3	700
1.21	2012	200	4	17	501
1.12	2012	200	4	17	501
1.54	2012	200	4	17	501
1.73	2012	200	5	17.8	1339
1.1	2012	200	5	17.8	1339
1.5	2012	200	5	17.8	1339
1.13	2012	200	6	19.5	1318
1.64	2012	200	6	19.5	1318
1.03	2012	200	6	19.5	1318
1.27	2012	200	7	19.4	781
1.67	2012	200	7	19.4	781
1.5	2012	200	7	19.4	781
1.41	2012	200	8	18.9	870
1.37	2012	200	8	18.9	870
1.23	2012	200	8	18.9	870
1.22	2012	200	9	17.7	226
1.27	2012	200	9	17.7	226
1	2012	200	9	17.7	226
1.98	2012	200	10	20.2	1241
2.28	2012	200	10	20.2	1241
1.59	2012	200	10	20.2	1241
2.01	2012	200	11	21.2	1095
2.48	2012	200	11	21.2	1095
1.64	2012	200	11	21.2	1095
2.29	2012	1000	1	16.7	400
1.53	2012	1000	1	16.7	400
2.49	2012	1000	1	16.7	400
1.96	2012	1000	2	15.9	320
2.08	2012	1000	2	15.9	320
2.17	2012	1000	2	15.9	320
1.82	2012	1000	3	18.2	700
1.54	2012	1000	3	18.2	700
1.75	2012	1000	3	18.2	700
1.29	2012	1000	4	17.1	469
1.53	2012	1000	4	17.1	469
1.67	2012	1000	4	17.1	469
1.35	2012	1000	5	17.6	1334
1.47	2012	1000	5	17.6	1334
1.96	2012	1000	5	17.6	1334
0.73	2012	1000	6	19.2	1318
1.78	2012	1000	6	19.2	1318
1.35	2012	1000	6	19.2	1318
0.34	2012	1000	7	18.8	764
0.6	2012	1000	7	18.8	764
0.82	2012	1000	7	18.8	764
2.08	2012	1000	8	18.7	896
1.75	2012	1000	8	18.7	896
1.15	2012	1000	8	18.7	896
1.24	2012	1000	9	17.8	229
0.61	2012	1000	9	17.8	229
1.15	2012	1000	9	17.8	229
1.8	2012	1000	10	19.1	1373
1.07	2012	1000	10	19.1	1373
1.34	2012	1000	10	19.1	1373
1.03	2012	1000	11	21.4	1025
0.9	2012	1000	11	21.4	1025
0.95	2012	1000	11	21.4	1025
1.67	2012	2000	1	16.6	400
1.36	2012	2000	1	16.6	400
2.03	2012	2000	1	16.6	400
1.16	2012	2000	2	15.9	320
1.55	2012	2000	2	15.9	320
1.22	2012	2000	2	15.9	320
1.88	2012	2000	3	18.1	700
2.05	2012	2000	3	18.1	700
2.11	2012	2000	3	18.1	700
1.17	2012	2000	4	17.1	492
1.37	2012	2000	4	17.1	492
1.35	2012	2000	4	17.1	492
2.13	2012	2000	5	17.7	1389
2.05	2012	2000	5	17.7	1389
2.95	2012	2000	5	17.7	1389
1.78	2012	2000	6	19.4	1318
1.8	2012	2000	6	19.4	1318
2.22	2012	2000	6	19.4	1318
1.9	2012	2000	7	19.3	768
1.98	2012	2000	7	19.3	768
1.84	2012	2000	7	19.3	768
1.87	2012	2000	8	18.8	914
1.99	2012	2000	8	18.8	914
2.08	2012	2000	8	18.8	914
0.82	2012	2000	9	17.8	226
1.26	2012	2000	9	17.8	226
1.25	2012	2000	9	17.8	226
2.55	2012	2000	10	19.2	1373
2.91	2012	2000	10	19.2	1373
1.81	2012	2000	10	19.2	1373
1.65	2012	2000	11	20.9	1068
1.6	2012	2000	11	20.9	1068
1.9	2012	2000	11	20.9	1068
2.51	2013	200	1	14.6	649
2.27	2013	200	1	14.6	649
2.59	2013	200	1	14.6	649
1.76	2013	200	2	11.1	575
1.32	2013	200	2	11.1	575
1.01	2013	200	2	11.1	575
1.7	2013	200	3	10.8	692
1.53	2013	200	3	10.8	692
1.67	2013	200	3	10.8	692
2.31	2013	200	4	10	1352
0.93	2013	200	4	10	1352
1.87	2013	200	4	10	1352
1.85	2013	200	5	12.5	909
1.8	2013	200	5	12.5	909
1.53	2013	200	5	12.5	909
1.61	2013	200	6	13.3	500
1.84	2013	200	6	13.3	500
1.26	2013	200	6	13.3	500
1.57	2013	200	7	13.3	329
2.04	2013	200	7	13.3	329
1.64	2013	200	7	13.3	329
1.92	2013	200	8	14.4	1130
2.22	2013	200	8	14.4	1130
2.32	2013	200	8	14.4	1130
2.22	2013	200	9	15.7	498
2.22	2013	200	9	15.7	498
2.52	2013	200	9	15.7	498
2.65	2013	1000	1	14.3	603
2.07	2013	1000	1	14.3	603
2	2013	1000	1	14.3	603
2	2013	1000	2	11.1	708
5.33	2013	1000	2	11.1	708
1.65	2013	1000	2	11.1	708
3.57	2013	1000	3	12.1	630
2.51	2013	1000	3	12.1	630
3.09	2013	1000	3	12.1	630
2.15	2013	1000	4	10	1352
1.94	2013	1000	4	10	1352
1.76	2013	1000	4	10	1352
1.31	2013	1000	5	12.6	738
1.94	2013	1000	5	12.6	738
2.01	2013	1000	5	12.6	738
1.77	2013	1000	6	13.4	520
1.55	2013	1000	6	13.4	520
1.69	2013	1000	6	13.4	520
1.99	2013	1000	7	13.4	328
1.98	2013	1000	7	13.4	328
1.65	2013	1000	7	13.4	328
2.23	2013	1000	8	14.7	1189
2.15	2013	1000	8	14.7	1189
1.74	2013	1000	8	14.7	1189
4.52	2013	1000	9	16.2	557
2.93	2013	1000	9	16.2	557
2.34	2013	1000	9	16.2	557
1.81	2013	2000	1	14.5	627
2.32	2013	2000	1	14.5	627
2.03	2013	2000	1	14.5	627
2	2013	2000	2	11.1	591
2.07	2013	2000	2	11.1	591
2.1	2013	2000	2	11.1	591
2.15	2013	2000	3	10.8	689
2.44	2013	2000	3	10.8	689
3.15	2013	2000	3	10.8	689
1.49	2013	2000	4	10	1237
1.57	2013	2000	4	10	1237
1.73	2013	2000	4	10	1237
1.89	2013	2000	5	12.6	786
2.32	2013	2000	5	12.6	786
2.18	2013	2000	5	12.6	786
2.34	2013	2000	6	13.4	498
2.2	2013	2000	6	13.4	498
2.4	2013	2000	6	13.4	498
2.4	2013	2000	7	13.3	334
2.79	2013	2000	7	13.3	334
3.03	2013	2000	7	13.3	334
3.22	2013	2000	8	14.6	1170
2.74	2013	2000	8	14.6	1170
2.86	2013	2000	8	14.6	1170
4.25	2013	2000	9	15.8	527
3.71	2013	2000	9	15.8	527
3.07	2013	2000	9	15.8	527
